# Supplementary material for: Physicochemical Characterisation of Polysaccharide Films with Embedded Bioactive Substances
Source: MDPI journal article supplement (doi:10.3390/foods12244454), 2023-12-12
Supplement: s1 [file s1]

# Physicochemical Characterisation of Polysaccharide Films with Embedded Bioactive Substances

Shweta Gautam<sup>1</sup>, Lubomir Lapcik<sup>1,2,\*</sup>, Barbora Lapcikova<sup>1,2</sup>, David Repka<sup>2</sup>, Lilianna Szyk-Warszyńska<sup>3</sup>

<sup>1</sup> Department of Foodstuff Technology, Faculty of Technology, Tomas Bata University in Zlín, Nam. T.G. Masaryka 5555, 76001 Zlín, Czechia; gautam@utb.cz (S.G.); lapcicl@seznam.cz (L.L.); lapcikova@utb.cz or barbora.lapcikova@upol.cz (B.L.)

<sup>2</sup> Department of Physical Chemistry, Faculty of Science, Palacky University in Olomouc, 17. Listopadu 12, 771 46 Olomouc, Czechia; david.repka@upol.cz (D.R.)

<sup>3</sup> Jerzy Haber Institute of Catalysis and Surface Chemistry, Polish Academy of Sciences, Niezapominajek 8, 30239 Kraków, Poland liliana.szyk-warszynska@ikifp.edu.pl (L.S.)

\*Correspondence: lapcik@utb.cz or lapcicl@seznam.cz or lubomir.lapcik@upol.cz; Tel: +420-576-035-115

**Citation:** Gautam, S.; Lapcik, L.; Lapcikova, B.; Repka, D.; Szyk-Warszyńska, L. Physicochemical Characterisation of Polysaccharide Films with Embedded Bioactive Substances. *Foods* **2023**, *12*, 4454. <https://doi.org/10.3390/foods12244454>

Academic Editor: Cristóbal Noé Aguilar González

Received: 27 November 2023

Revised: 8 December 2023

Accepted: 11 December 2023

Published: 12 December 2023

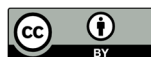

**Copyright:** © 2023 by the authors. Licensee MDPI, Basel, Switzerland. This article is an open access article distributed under the terms and conditions of the Creative Commons Attribution (CC BY) license (<https://creativecommons.org/licenses/by/4.0/>).

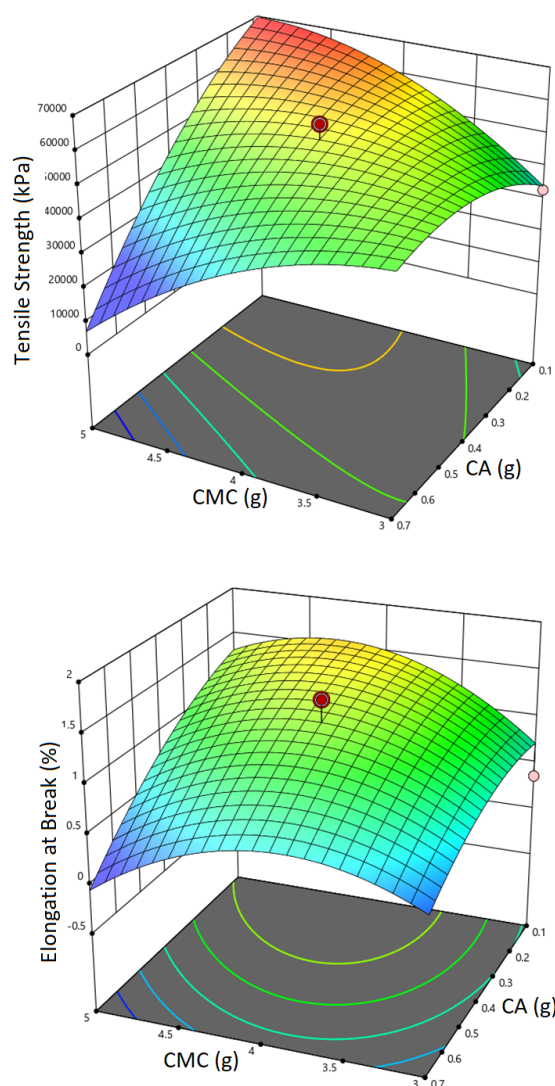

**Figure S1.** Response surface plots representing the effect of Sodium Carboxymethyl cellulose (CMCNa) and citric acid (CA) concentration on Tensile strength (A) and Elongation at break (B).

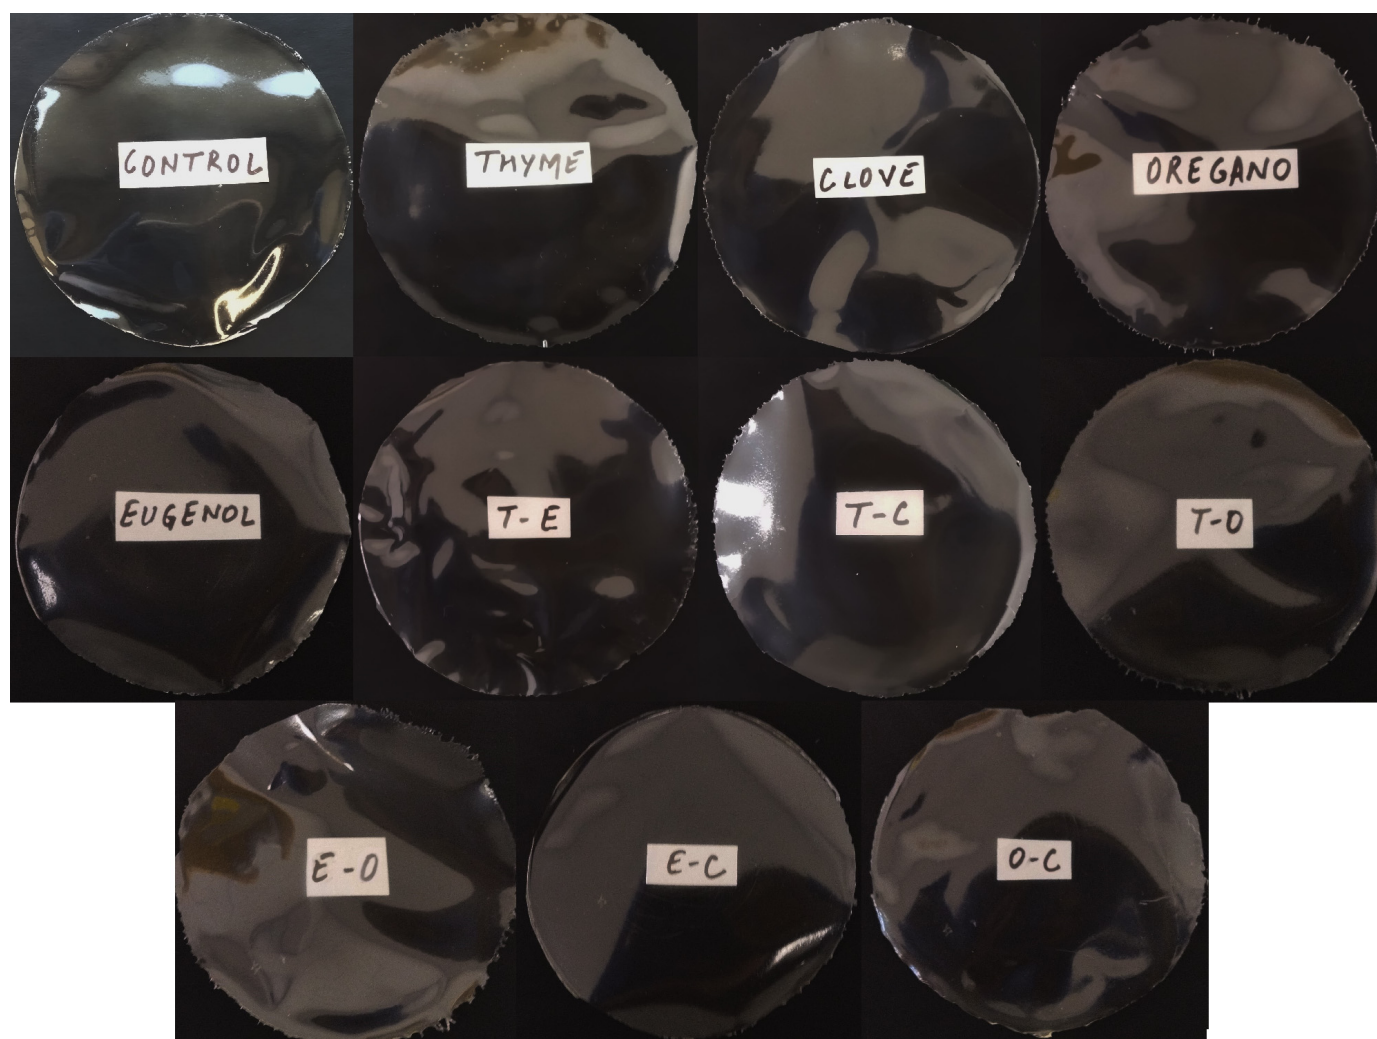

**Figure S2.** Physical appearance of the prepared films

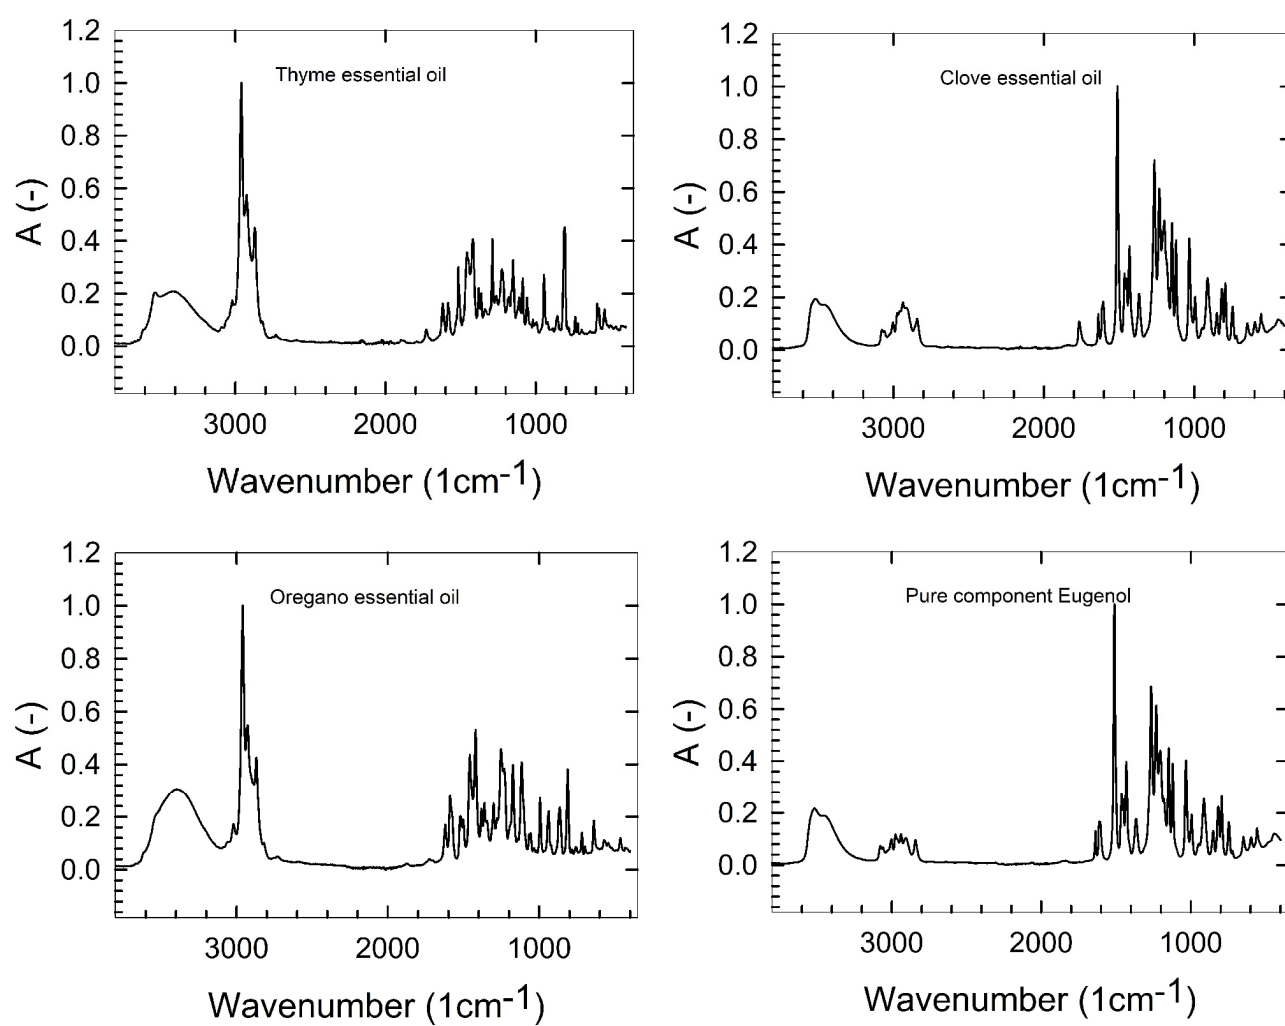

**Figure S3.** FT-IR analysis of the pure bioactive substances.

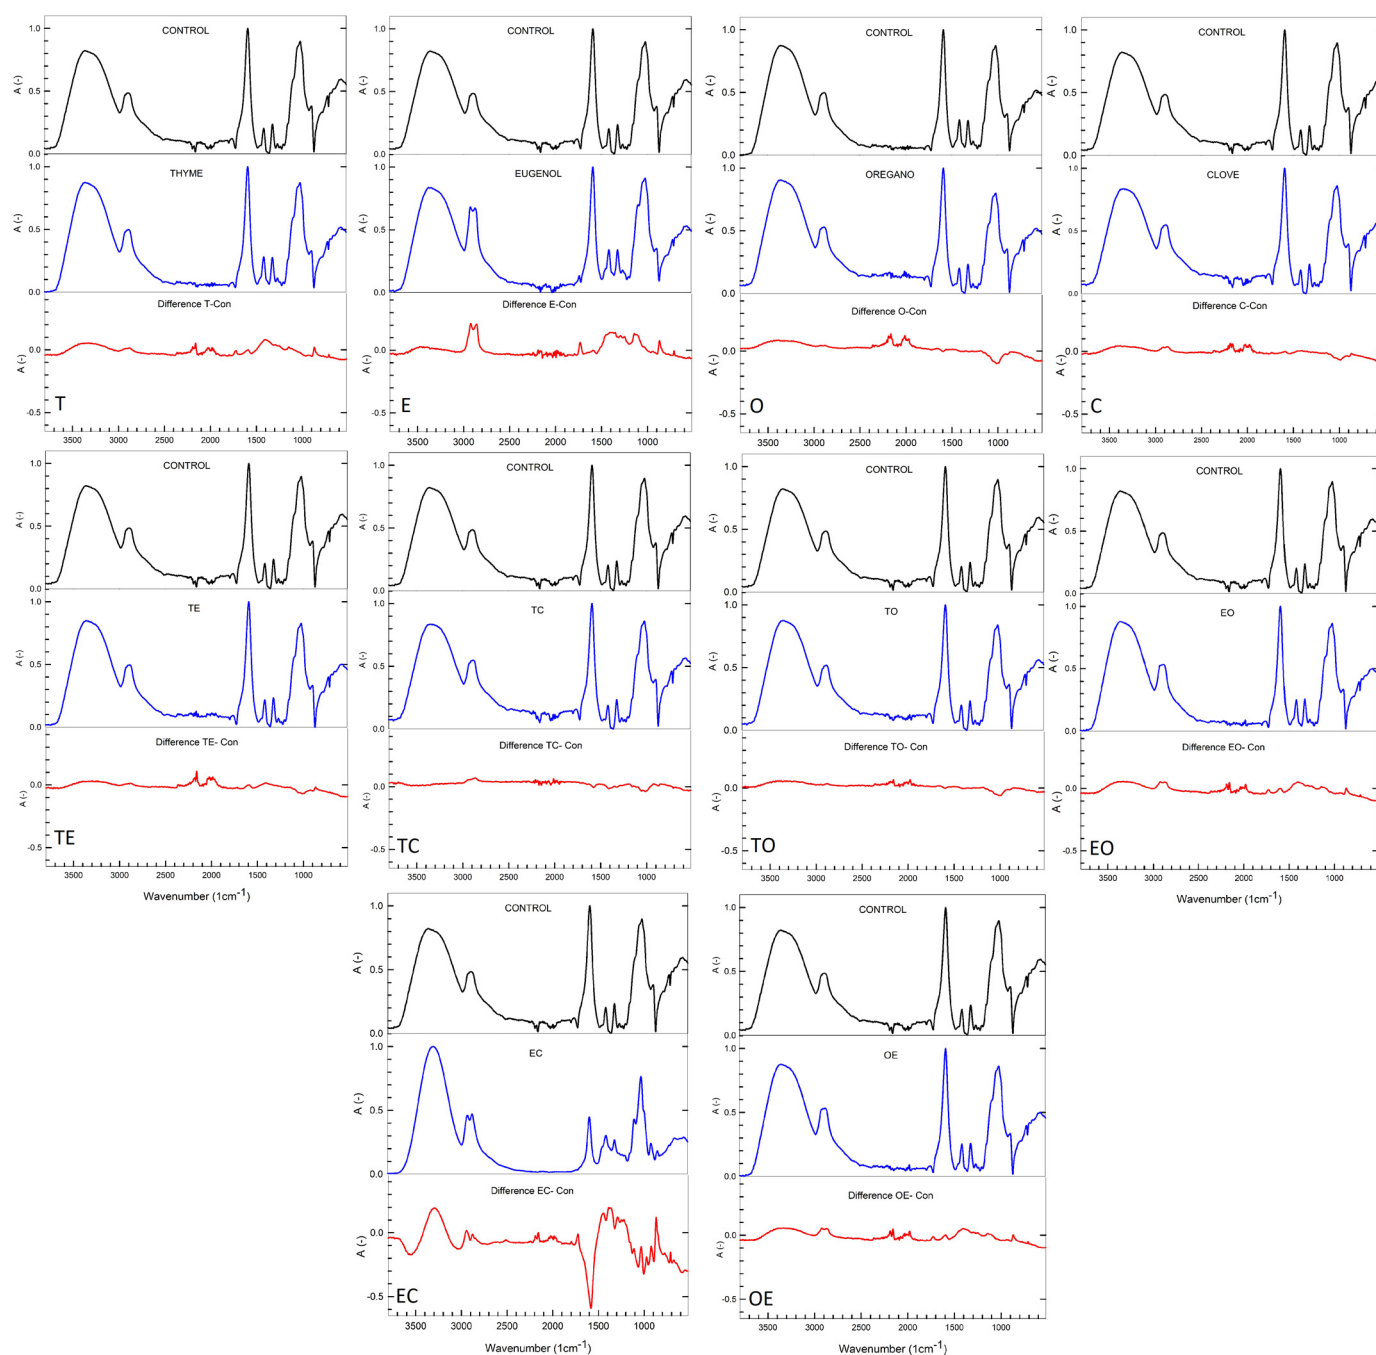

**Figure S4.** FT-IR analysis of films with bioactive components. The graphs are presented after subtracting the sample values from the control values to show the presence of bioactive components.

**Table S1.** Mechanical properties of the samples.

| Sample | Tensile strength (MPa)   | Elongation at break (%)  | Elastic modulus (GPa)    |
|--------|--------------------------|--------------------------|--------------------------|
| Con    | 0.87 ± 0.07 <sup>a</sup> | 1.18 ± 0.06 <sup>a</sup> | 5.51 ± 0.51 <sup>a</sup> |
| T      | 0.73 ± 0.24 <sup>a</sup> | 1.69 ± 0.71 <sup>a</sup> | 4.61 ± 1.69 <sup>a</sup> |
| E      | 0.58 ± 0.16 <sup>a</sup> | 1.24 ± 0.33 <sup>a</sup> | 5.40 ± 0.30 <sup>a</sup> |
| O      | 0.61 ± 0.05 <sup>a</sup> | 1.77 ± 0.51 <sup>a</sup> | 4.85 ± 0.87 <sup>a</sup> |
| C      | 0.87 ± 0.07 <sup>a</sup> | 1.39 ± 0.12 <sup>a</sup> | 4.62 ± 0.64 <sup>a</sup> |
| T-E    | 0.96 ± 0.25 <sup>a</sup> | 2.06 ± 0.60 <sup>a</sup> | 4.62 ± 1.07 <sup>a</sup> |
| T-O    | 0.78 ± 0.16 <sup>a</sup> | 1.72 ± 0.30 <sup>a</sup> | 4.83 ± 0.48 <sup>a</sup> |
| T-C    | 0.79 ± 0.29 <sup>a</sup> | 1.46 ± 0.57 <sup>a</sup> | 4.44 ± 0.11 <sup>a</sup> |
| E-O    | 0.55 ± 0.06 <sup>a</sup> | 1.27 ± 0.43 <sup>a</sup> | 4.03 ± 0.79 <sup>a</sup> |
| E-C    | 0.76 ± 0.09 <sup>a</sup> | 2.44 ± 0.96 <sup>a</sup> | 3.16 ± 0.45 <sup>a</sup> |
| O-C    | 0.65 ± 0.22 <sup>a</sup> | 1.15 ± 0.33 <sup>a</sup> | 5.01 ± 1.06 <sup>a</sup> |

Results are mentioned as arithmetic mean ± standard deviation of three replicates. The values followed by the same letters in the same row are not significantly different at the significance level of  $p \leq 0.05$  by the Tukey test.

**Table S2.** Antioxidant activity (presented as % inhibition) of the samples at 4 °C.

| Sample | DW @ 4°                    | AA                         | EtOH 10%                   | EtOH 50%                  |
|--------|----------------------------|----------------------------|----------------------------|---------------------------|
| Con    | 22.62 ± 0.62 <sup>a</sup>  | 15.80 ± 2.01 <sup>a</sup>  | 23.77 ± 2.47 <sup>a</sup>  | 21.84 ± 2.92 <sup>a</sup> |
| T      | 28.59 ± 5.81 <sup>a</sup>  | 18.55 ± 2.37 <sup>a</sup>  | 38.99 ± 4.67 <sup>a</sup>  | 37.38 ± 8.39 <sup>a</sup> |
| E      | 76.77 ± 7.78 <sup>b</sup>  | 34.14 ± 4.75 <sup>b</sup>  | 50.33 ± 9.20 <sup>b</sup>  | 72.99 ± 1.40 <sup>a</sup> |
| O      | 22.15 ± 0.45 <sup>a</sup>  | 12.37 ± 2.29 <sup>a</sup>  | 30.51 ± 4.99 <sup>b</sup>  | 29.38 ± 2.89 <sup>a</sup> |
| C      | 48.43 ± 5.44 <sup>c</sup>  | 30.11 ± 4.27 <sup>a</sup>  | 48.47 ± 10.08 <sup>b</sup> | 68.78 ± 3.85 <sup>a</sup> |
| T-E    | 27.19 ± 12.43 <sup>a</sup> | 21.89 ± 4.04 <sup>ab</sup> | 39.77 ± 8.14 <sup>ab</sup> | 50.92 ± 3.81 <sup>a</sup> |
| T-O    | 24.29 ± 4.37 <sup>a</sup>  | 15.02 ± 3.54 <sup>ab</sup> | 26.40 ± 3.89 <sup>ab</sup> | 30.80 ± 5.11 <sup>a</sup> |
| T-C    | 64.69 ± 9.00 <sup>b</sup>  | 30.75 ± 3.59 <sup>ab</sup> | 68.97 ± 1.27 <sup>c</sup>  | 66.40 ± 7.00 <sup>a</sup> |
| E-O    | 74.84 ± 1.40 <sup>b</sup>  | 26.58 ± 4.77 <sup>ab</sup> | 50.14 ± 12.31 <sup>c</sup> | 58.74 ± 1.85 <sup>a</sup> |
| E-C    | 59.49 ± 7.35 <sup>b</sup>  | 10.35 ± 3.16 <sup>b</sup>  | 58.22 ± 9.08 <sup>c</sup>  | 80.84 ± 2.42 <sup>b</sup> |
| O-C    | 43.74 ± 9.94 <sup>ac</sup> | 21.94 ± 1.69 <sup>ab</sup> | 48.13 ± 10.9 <sup>ab</sup> | 64.02 ± 4.23 <sup>a</sup> |

Results are mentioned as arithmetic mean ± standard deviation of three replicates. The values followed by the same letters in the same row are not significantly different at the significance level of  $p \leq 0.05$  by the Tukey test.

**Table S3.** Antioxidant activity (presented as % inhibition) of the samples at 25 °C.

| Sample | DW @ 25°                  | AA                        | EtOH 10%                  | EtOH 50%                  |
|--------|---------------------------|---------------------------|---------------------------|---------------------------|
| Con    | 20.77 ± 0.65 <sup>a</sup> | 16.15 ± 1.47 <sup>a</sup> | 17.38 ± 0.97 <sup>a</sup> | 10.10 ± 7.96 <sup>a</sup> |
| T      | 51.39 ± 1.65 <sup>a</sup> | 23.52 ± 3.68 <sup>a</sup> | 29.72 ± 1.26 <sup>a</sup> | 41.34 ± 5.78 <sup>a</sup> |
| E      | 60.16 ± 0.46 <sup>b</sup> | 44.54 ± 11.2 <sup>a</sup> | 33.52 ± 1.12 <sup>a</sup> | 64.16 ± 6.80 <sup>a</sup> |
| O      | 21.95 ± 1.40 <sup>b</sup> | 24.94 ± 2.86 <sup>a</sup> | 17.32 ± 0.37 <sup>a</sup> | 23.18 ± 4.84 <sup>a</sup> |
| C      | 66.60 ± 0.64 <sup>c</sup> | 46.10 ± 3.12 <sup>a</sup> | 37.93 ± 1.68 <sup>a</sup> | 67.26 ± 7.92 <sup>a</sup> |

|     |                           |                            |                            |                            |
|-----|---------------------------|----------------------------|----------------------------|----------------------------|
| T-E | 44.12 ± 0.40 <sup>b</sup> | 37.56 ± 2.17 <sup>a</sup>  | 54.26 ± 1.58 <sup>a</sup>  | 47.42 ± 4.12 <sup>a</sup>  |
| T-O | 29.13 ± 2.06 <sup>b</sup> | 27.89 ± 1.42 <sup>a</sup>  | 18.28 ± 1.28 <sup>a</sup>  | 31.52 ± 4.85 <sup>a</sup>  |
| T-C | 54.94 ± 0.65 <sup>b</sup> | 47.19 ± 0.94 <sup>a</sup>  | 59.76 ± 1.45 <sup>b</sup>  | 73.52 ± 5.99 <sup>a</sup>  |
| E-O | 43.47 ± 0.56 <sup>b</sup> | 55.70 ± 0.47 <sup>b</sup>  | 56.84 ± 0.89 <sup>ab</sup> | 75.08 ± 1.34 <sup>b</sup>  |
| E-C | 43.47 ± 8.11 <sup>b</sup> | 42.91 ± 7.38 <sup>ab</sup> | 61.59 ± 1.04 <sup>ab</sup> | 65.66 ± 9.12 <sup>ab</sup> |
| O-C | 43.47 ± 1.07 <sup>b</sup> | 41.99 ± 3.62 <sup>a</sup>  | 57.46 ± 2.71 <sup>a</sup>  | 70.46 ± 2.85 <sup>ab</sup> |

Results are mentioned as arithmetic mean ± standard deviation of three replicates. The values followed by the same letters in the same row are not significantly different at the significance level of  $p \leq 0.05$  by the Tukey test.

**Disclaimer/Publisher's Note:** The statements, opinions and data contained in all publications are solely those of the individual author(s) and contributor(s) and not of MDPI and/or the editor(s). MDPI and/or the editor(s) disclaim responsibility for any injury to people or property resulting from any ideas, methods, instructions or products referred to in the content.
